# Supplementary material for: Molecular design of cage iron(ii) and cobalt(ii,iii) complexes with a second fluorine-enriched superhydrophobic shell
Source: Royal Society of Chemistry journal article supplement (doi:10.1039/c4dt03628j), 2015-01-01
Supplement: c4dt03628j1.pdf [file c4dt03628j1.pdf]

## Electronic Supporting Information

for

### **Molecular design of cage iron(II) and cobalt(II,III) complexes with a second fluorine-enriched superhydrophobic shell**

Alexander S. Belov,<sup>a</sup> Genrikh E. Zelinskii,<sup>a</sup> Oleg A. Varzatskii,<sup>b</sup> Irina G. Belaya,<sup>a</sup>  
Anna V. Vologzhanina,<sup>a</sup> Alexander V. Dolganov,<sup>a</sup> Valentin V. Novikov<sup>a</sup>, Yan Z.  
Voloshin<sup>\*a</sup>

<sup>a</sup> *Nesmeyanov Institute of Organoelement Compounds of the Russian Academy of Sciences,  
119991 Moscow, Russia, fax: +7-499-135-50-85, e-mail: [voloshin@ineos.ac.ru](mailto:voloshin@ineos.ac.ru)*

<sup>b</sup> *Vernadskii Institute of General and Inorganic Chemistry of the National Academy of Sciences  
of Ukraine, 03680 Kyiv, Ukraine*

## Experimental section

**Materials and Physical Measurements.** The reagents used,  $\text{FeCl}_2 \cdot 4\text{H}_2\text{O}$ ,  $\text{CoCl}_2 \cdot 6\text{H}_2\text{O}$ ,  $(\text{C}_2\text{H}_5)_3\text{N}$ ,  $\text{C}_6\text{F}_5\text{SH}$ ,  $\text{ClC}_6\text{F}_4\text{SH}$ ,  $\text{CF}_3\text{C}_6\text{F}_4\text{SH}$ ,  $\text{C}_6\text{F}_5\text{B}(\text{OH})_2$ , sorbents and organic solvents were obtained commercially (SAF). The dichloroglyoxime (denoted as  $\text{Cl}_2\text{GmH}_2$ ) was prepared by chlorination of glyoxime as described in ref. S1.

Analytical data (C, H, N contents) were obtained with a Carlo Erba model 1106 microanalyzer. Iron, boron and fluorine contents were determined spectrophotometrically. Sulfur content was determined by titrimetry using the Shoeniger method. Cobalt content was determined by X-ray fluorescence analysis. Chlorine content was determined by gravimetry.

MALDI-TOF mass spectra were recorded using a MALDI-TOF-MS Bruker Autoflex II (Bruker Daltonics) mass spectrometer in reflecto-mol mode. The ionization was induced by UV-laser with wavelength 337 nm. The samples were applied to a nickel plate, 2,5-dihydroxybenzoic acid was used as the matrix. The accuracy of measurements was 0.1%.

IR spectra of the solid samples (KBr tablets) in the range 400 – 4000  $\text{cm}^{-1}$  were recorded with a Perkin Elmer FT-IR Spectrum BX II spectrometer.

UV-Vis spectra of solutions in dichloromethane were recorded in the range 230 – 900 nm with a Lambda 9 Perkin Elmer spectrophotometer. The individual Gaussian components of these spectra were calculated using the SPECTRA program.

$^{13}\text{C}$  and  $^{19}\text{F}$  NMR spectra were recorded from  $\text{CD}_2\text{Cl}_2$ ,  $\text{CDCl}_3$  or  $\text{C}_6\text{D}_6$  solutions with a Bruker Avance 400 and 600 spectrometers. The measurements were done using the residual signals of deuterated solvents ( $\text{CD}_2\text{Cl}_2$ :  $^{13}\text{C}$  53.8 ppm;  $\text{CDCl}_3$ :  $^{13}\text{C}$  77.0 ppm;  $\text{C}_6\text{D}_6$ :  $^{13}\text{C}$  128.1 ppm). The  $^{19}\text{F}$  NMR chemical shifts were referenced to external  $\text{CFCl}_3$ .

$^{57}\text{Fe}$  Mössbauer absorption spectra of the iron complexes were recorded at 298 K using a NP-255 spectrometer (Hungary) with a constant acceleration mode and a symmetrical triangular change in the velocity of a  $\gamma$ -quantum source ( $^{57}\text{Co}$  in a rhodium matrix with an activity equal to 5 mCi and with a line emission width equal to  $0.11 \text{ mm s}^{-1}$ ). The spectra were collected with a 511-multichannel analyzer. The speed scale of the spectrometer was calibrated using the spectrum of sodium nitroprusside as a standard. The isomeric shift (IS) value was obtained relative to the center of this spectrum.

Cyclic voltammetry (CV) experiments were carried out in acetonitrile solutions with 0.1 M  $((n\text{-C}_4\text{H}_9)_4\text{N})(\text{BF}_4)$  as supporting electrolyte using a model Parstat 2273 (Princeton Applied Research, USA) potentiostat with a conventional and one-compartment three-electrode cell (10 ml of solution). Glass carbon (GC) with an active surface area of  $0.125 \text{ cm}^2$  was used as a working electrode. The electrode was thoroughly polished and rinsed before measurements. A glass carbon (GC) counter electrode and standard  $\text{Ag}/\text{AgCl}/\text{KCl}_{\text{aq}}$  reference electrode (RE) were applied. All potentials were referred to this RE. All the solutions were thoroughly deaerated by passing argon through the solutions before the CV experiments and above these solutions during the measurements.

The magnetic susceptibility of the polycrystalline samples was measured with a Quantum Design MPMSXL SQUID magnetometer in the temperature range 2–300 K with magnetic field of up to 5 kOe. None of complexes exhibited any field dependence of molar magnetization at low temperatures. The diamagnetic corrections were made using the Pascal constants. The effective magnetic moment was calculated as  $\mu_{\text{eff}}(T) = [(3k/N_A\mu_B^2)\chi T]^{1/2} \approx (8\chi T)^{1/2}$ .

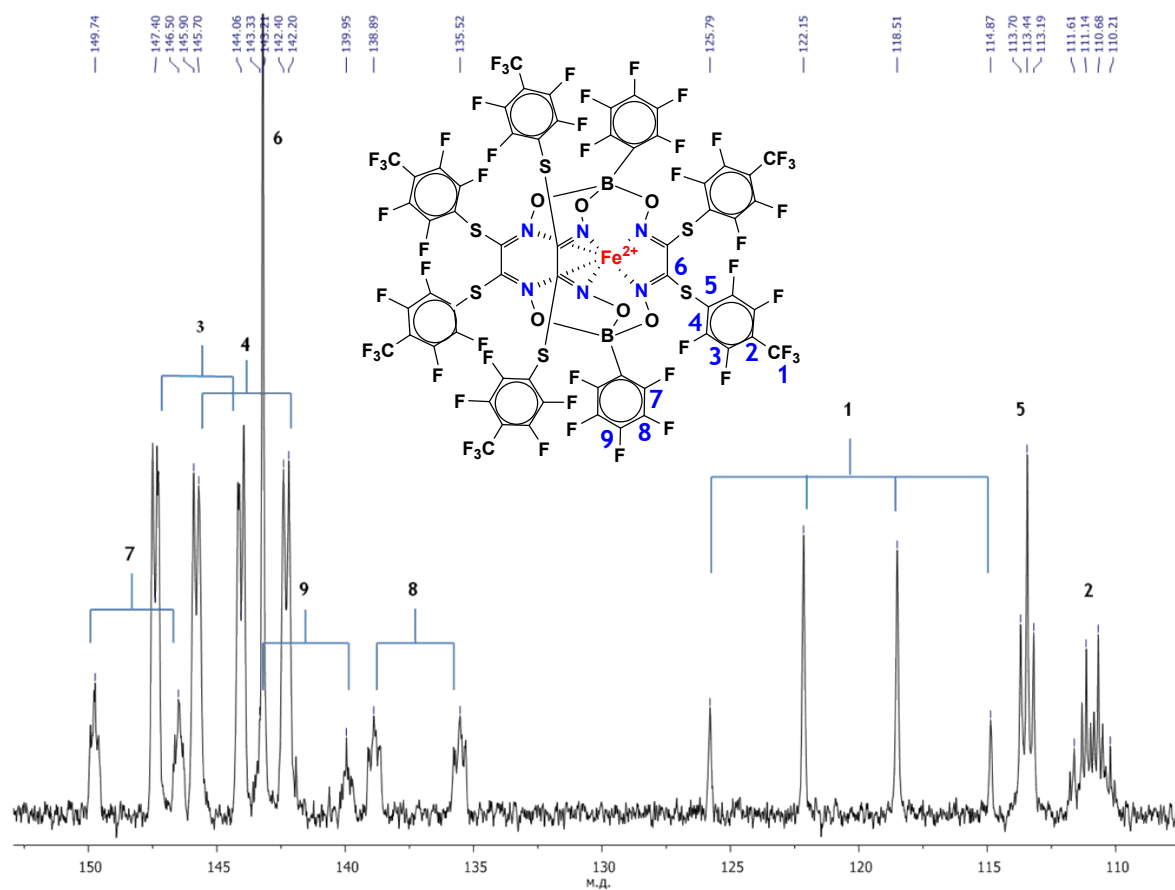

Fig. S1. The  $^{13}\text{C}$  NMR spectrum of the clathrochelate  $\text{Fe}((\text{CF}_3\text{C}_6\text{F}_4\text{S})_2\text{Gm})_3(\text{BC}_6\text{F}_5)_2$  in  $\text{CD}_2\text{Cl}_2$  solution. Assignment of the signals is as follows: the ribbed fragments: **1**:  $\underline{\text{C}}\text{F}_3$ ; **2**:  $\underline{\text{C}}-\text{CF}_3$ ; **3**:  $\text{CF}_3-\underline{\text{C}}-\text{F}$ ; **4**:  $\text{S}-\underline{\text{C}}-\text{CF}$ , **5**:  $\text{S}-\underline{\text{C}}$ ; **6**:  $\text{C}=\text{N}$ ; the apical groups: **7**: *ortho*- $\underline{\text{C}}\text{F}$ ; **8**: *meta*- $\underline{\text{C}}\text{F}$ ; **9**: *para*- $\underline{\text{C}}\text{F}$ .

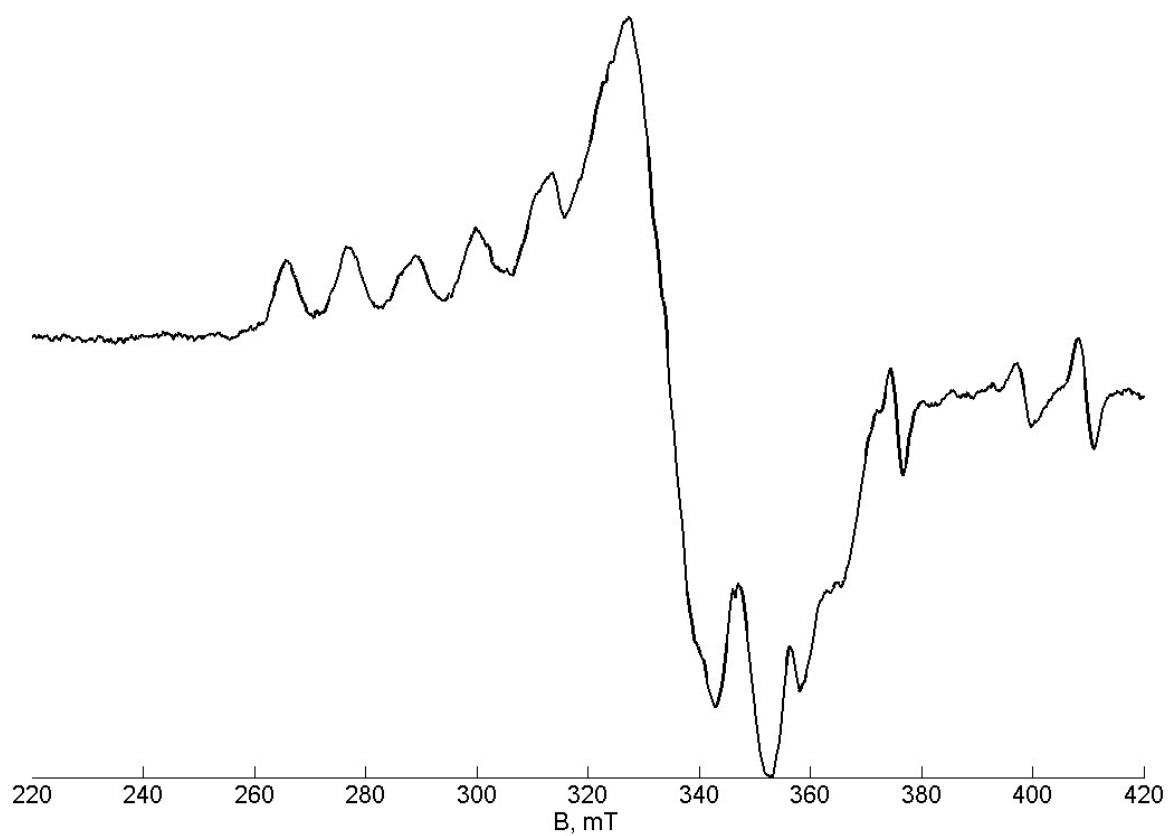

Fig. S2. X-band EPR spectrum of a frozen 1 mM toluene solution of the hexachloroclathrochelate  $\text{Co}(\text{Cl}_2\text{Gm})_3(\text{BC}_6\text{F}_5)_2$  at 80K.

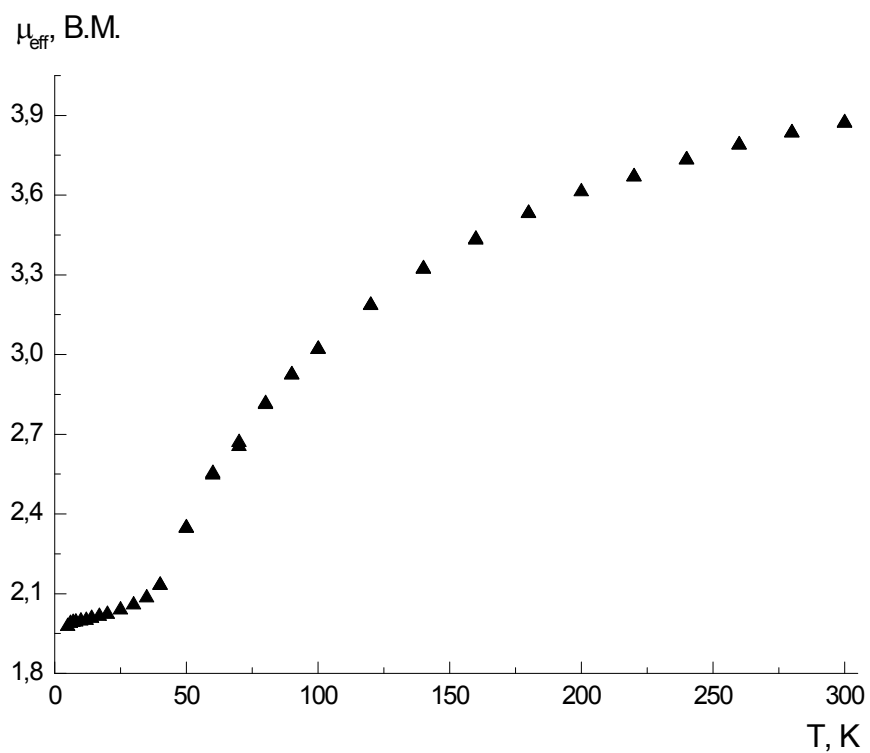

Figure S3. Temperature plot of the effective magnetic moment  $\mu_{\text{eff}}$  for the fine-crystalline sample of the hexachloroclathrochelate  $\text{Co}(\text{Cl}_2\text{Gm})_3(\text{BC}_6\text{F}_5)_2$ .

Table S1. Crystallographic data and refinement parameters for the (per)fluorinated iron(II) and cobalt(II,III) mono- and trinuclear cage complexes

|                                                                 | Fe(Cl <sub>2</sub> Gm) <sub>3</sub> (BC <sub>6</sub> F <sub>5</sub> ) <sub>2</sub>             | Fe((ClC <sub>6</sub> F <sub>4</sub> S) <sub>2</sub> Gm) <sub>3</sub> (BC <sub>6</sub> F <sub>5</sub> ) <sub>2</sub> ·<br>0.5 C <sub>7</sub> H <sub>16</sub> | Fe((CF <sub>3</sub> C <sub>6</sub> F <sub>4</sub> S) <sub>2</sub> Gm) <sub>3</sub> (BC <sub>6</sub> F <sub>5</sub> ) <sub>2</sub> | Co((CF <sub>3</sub> C <sub>6</sub> F <sub>4</sub> S) <sub>2</sub> Gm) <sub>3</sub> (BC <sub>6</sub> F <sub>5</sub> ) <sub>2</sub> | (Co((C <sub>6</sub> F <sub>5</sub> S) <sub>2</sub> Gm) <sub>3</sub> (BC <sub>6</sub> F <sub>5</sub> )) <sub>2</sub> Co |
|-----------------------------------------------------------------|------------------------------------------------------------------------------------------------|-------------------------------------------------------------------------------------------------------------------------------------------------------------|-----------------------------------------------------------------------------------------------------------------------------------|-----------------------------------------------------------------------------------------------------------------------------------|------------------------------------------------------------------------------------------------------------------------|
| Empirical formula                                               | C <sub>18</sub> B <sub>2</sub> Cl <sub>6</sub> F <sub>10</sub> FeN <sub>6</sub> O <sub>6</sub> | C <sub>57.5</sub> H <sub>8</sub> B <sub>2</sub> Cl <sub>6</sub> F <sub>34</sub> FeN <sub>6</sub> O <sub>6</sub> S <sub>6</sub>                              | C <sub>60</sub> B <sub>2</sub> F <sub>52</sub> FeN <sub>6</sub> O <sub>6</sub> S <sub>6</sub>                                     | C <sub>60</sub> B <sub>2</sub> CoF <sub>53</sub> N <sub>6</sub> O <sub>6</sub> S <sub>6</sub>                                     | C <sub>96</sub> B <sub>2</sub> Co <sub>3</sub> F <sub>70</sub> N <sub>12</sub> O <sub>12</sub> S <sub>12</sub>         |
| Fw                                                              | 876.41                                                                                         | 2007.23                                                                                                                                                     | 2158.49                                                                                                                           | 2180.57                                                                                                                           | 3426.12                                                                                                                |
| Color, habit                                                    | Red, plate                                                                                     | Violet, prism                                                                                                                                               | Red, plate                                                                                                                        | Red, needle                                                                                                                       | Purple, plate                                                                                                          |
| Crystal size (mm <sup>3</sup> )                                 | 0.36 × 0.25 × 0.04                                                                             | 0.25 × 0.12 × 0.09                                                                                                                                          | 0.32 × 0.18 × 0.07                                                                                                                | 0.31 × 0.06 × 0.05                                                                                                                | 0.26 × 0.20 × 0.08                                                                                                     |
| <i>a</i> (Å)                                                    | 25.818(3)                                                                                      | 29.188(19)                                                                                                                                                  | 34.299(5)                                                                                                                         | 34.529(4)                                                                                                                         | 13.336(1)                                                                                                              |
| <i>b</i> (Å)                                                    | 8.0367(7)                                                                                      | 8.114(5)                                                                                                                                                    | 8.1151(12)                                                                                                                        | 8.1068(11)                                                                                                                        | 14.229(1)                                                                                                              |
| <i>c</i> (Å)                                                    | 16.0496(15)                                                                                    | 30.93(2)                                                                                                                                                    | 27.970(14)                                                                                                                        | 28.045(4)                                                                                                                         | 16.110(2)                                                                                                              |
| $\alpha$ (°)                                                    | 90                                                                                             | 90                                                                                                                                                          | 90                                                                                                                                | 90                                                                                                                                | 74.782(2)                                                                                                              |
| $\beta$ (°)                                                     | 127.284(2)                                                                                     | 101.479(12)                                                                                                                                                 | 119.218(3)                                                                                                                        | 119.062(3)                                                                                                                        | 80.604(3)                                                                                                              |
| $\gamma$ (°)                                                    | 90                                                                                             | 90                                                                                                                                                          | 90                                                                                                                                | 90                                                                                                                                | 77.766(3)                                                                                                              |
| <i>V</i> (Å <sup>3</sup> )                                      | 2649.0(4)                                                                                      | 7179(8)                                                                                                                                                     | 6794.6(17)                                                                                                                        | 6861.8(2)                                                                                                                         | 2864.0(5)                                                                                                              |
| <i>Z</i>                                                        | 4                                                                                              | 4                                                                                                                                                           | 4                                                                                                                                 | 4                                                                                                                                 | 2                                                                                                                      |
| Crystal system                                                  | Monoclinic                                                                                     | Monoclinic                                                                                                                                                  | Monoclinic                                                                                                                        | Monoclinic                                                                                                                        | Triclinic                                                                                                              |
| Space group                                                     | <i>C</i> 2/ <i>c</i>                                                                           | <i>C</i> 2/ <i>c</i>                                                                                                                                        | <i>C</i> 2/ <i>c</i>                                                                                                              | <i>C</i> 2/ <i>c</i>                                                                                                              | <i>P</i> -1                                                                                                            |
| <i>d</i> <sub>calc</sub> (g·cm <sup>-3</sup> )                  | 2.198                                                                                          | 1.857                                                                                                                                                       | 2.110                                                                                                                             | 2.111                                                                                                                             | 1.986                                                                                                                  |
| $\mu$ (mm <sup>-1</sup> )                                       | 1.299                                                                                          | 0.752                                                                                                                                                       | 0.611                                                                                                                             | 0.638                                                                                                                             | 0.830                                                                                                                  |
| 2 $\theta$ max (°)                                              | 56                                                                                             | 58                                                                                                                                                          | 52                                                                                                                                | 52                                                                                                                                | 56                                                                                                                     |
| Independent reflections ( <i>R</i> <sub>int</sub> )             | 3199 (0.029)                                                                                   | 9481 (0.114)                                                                                                                                                | 6641 (0.118)                                                                                                                      | 6669 (0.031)                                                                                                                      | 13800(0.118)                                                                                                           |
| Obs.refl./restraints/parameters                                 | 2884 / 0 / 249                                                                                 | 4703 / 11 / 541                                                                                                                                             | 4538 / 54 / 566                                                                                                                   | 5534 / 0 / 603                                                                                                                    | 5945 / 18/ 790                                                                                                         |
| <i>R</i> , <sup>a</sup> % [ <i>I</i> > 2 $\sigma$ ( <i>I</i> )] | 0.026                                                                                          | 0.075                                                                                                                                                       | 0.079                                                                                                                             | 0.048                                                                                                                             | 0.069                                                                                                                  |
| <i>R</i> <sub>w</sub> , <sup>b</sup> %                          | 0.076                                                                                          | 0.147                                                                                                                                                       | 0.202                                                                                                                             | 0.130                                                                                                                             | 0.131                                                                                                                  |
| <i>F</i> (000)                                                  | 1704                                                                                           | 3932                                                                                                                                                        | 4200                                                                                                                              | 4240                                                                                                                              | 1669                                                                                                                   |
| GOF <sup>c</sup>                                                | 1.06                                                                                           | 1.00                                                                                                                                                        | 1.06                                                                                                                              | 1.05                                                                                                                              | 0.99                                                                                                                   |

<sup>a</sup> $R = \sum | |F_o| - |F_c| | / \sum |F_o|$ , <sup>b</sup> $R_w = [\sum(w(F_o^2 - F_c^2)^2) / \sum(w(F_o^2))]^{1/2}$ , <sup>c</sup>GOF =  $[\sum w(F_o^2 - F_c^2)^2 / (N_{\text{obs}} - N_{\text{param}})]^{1/2}$

Table S2. Heights  $h$  of the  $FeN_6$ -coordination polyhedra (Å), bite  $\alpha$  and distortion  $\varphi$  angles (deg),  $^{57}\text{Fe}$  Mössbauer parameters ( $\text{mm}\cdot\text{s}^{-1}$ ), and  $f$  values ( $\text{mm s}^{-1}$ ) for the fluorine-containing iron(II) clathrochelates

| Complex                                                                                      | $h$  | $\alpha$ | $\varphi$ | IS   | QS   | $f$  | $f \times$<br>PQS | QS –<br>$f \times$ PQS |
|----------------------------------------------------------------------------------------------|------|----------|-----------|------|------|------|-------------------|------------------------|
| $\text{Fe}(\text{Cl}_2\text{Gm})_3(\text{BC}_6\text{F}_5)_2$                                 | 2.38 | 38.8     | 0.7       | 0.39 | 0.83 | 1.07 | 0.53              | +0.30                  |
| $\text{Fe}(\text{Cl}_2\text{Gm})_3(\text{BC}_6\text{H}_5)_2$ <sup>S2</sup>                   | 2.39 | 39.0     | 5.4       | 0.39 | 0.68 | 1.11 | 0.56              | +0.12                  |
| $\text{Fe}(\text{Cl}_2\text{Gm})_3(\text{Bn}-\text{C}_4\text{H}_9)_2$ <sup>S3</sup>          | 2.38 | 39.1     | 16.1      | 0.37 | 0.62 | 0.94 | 0.47              | +0.15                  |
| $\text{Fe}(\text{Cl}_2\text{Gm})_3(\text{BF})_2$ <sup>S3</sup>                               | 2.36 | 39.0     | 17.1      | 0.37 | 0.64 | 0.88 | 0.44              | +0.20                  |
| $\text{Fe}((\text{CF}_3\text{C}_6\text{F}_4\text{S})_2\text{Gm})_3(\text{BC}_6\text{F}_5)_2$ | 2.37 | 39.4     | 21.7      | 0.37 | 0.48 | 0.86 | 0.43              | +0.05                  |

Table S3. UV-vis spectra ( $\lambda_{\text{max}}/\text{nm}$ ,  $\varepsilon \cdot 10^{-3} \text{ mol}^{-1} \cdot \text{L} \cdot \text{cm}^3$ ) of the fluorine-containing iron and cobalt(II) clathrochelates and their analogs

| Compound                                                                                                            | $\lambda_1$ | $\lambda_2$ | $\lambda_3$ | $\lambda_4$ | $\lambda_5$ | $\lambda_6$ | $\lambda_7$ | $\lambda_8$ | $\lambda_9$ |
|---------------------------------------------------------------------------------------------------------------------|-------------|-------------|-------------|-------------|-------------|-------------|-------------|-------------|-------------|
| $\text{Fe}(\text{Cl}_2\text{Gm})_3(\text{BC}_6\text{F}_5)_2$                                                        | 264(12)     | 283(5.7)    | 297(4.1)    | 335(2.7)    |             | 422(3.9)    | 452(15)     |             |             |
| $\text{Fe}(\text{Cl}_2\text{Gm})_3(\text{BC}_6\text{H}_5)_2$ <sup>S2</sup>                                          | 266(12)     | 290(7.9)    | 308(4.9)    | 346(2.8)    |             | 425(5.9)    | 454(14)     |             |             |
| $\text{Fe}(\text{Cl}_2\text{Gm})_3(\text{Bn}-\text{C}_4\text{H}_9)_2$ <sup>S3</sup>                                 | 259(7.9)    | 285(5.4)    | 313(2.7)    |             |             | 423(4.8)    | 453 (15)    |             |             |
| $\text{Co}(\text{Cl}_2\text{Gm})_3(\text{BC}_6\text{F}_5)_2$                                                        | 266(9.8)    |             | 293(2.1)    | 328(1.5)    | 365(1.5)    | 430(0.4)    | 470(1.0)    |             |             |
| $\text{Co}(\text{Cl}_2\text{Gm})_3(\text{BC}_6\text{H}_5)_2$ <sup>12</sup>                                          | 266(24)     | 297(4.6)    | 321(3.9)    | 365(3.1)    |             | 428(1.0)    | 471(2.2)    |             |             |
| $\text{Co}(\text{Cl}_2\text{Gm})_3(\text{Bn}-\text{C}_4\text{H}_9)_2$ <sup>12</sup>                                 | 267(20)     | 287(8.4)    | 329(3.1)    | 368(3.2)    |             | 421(0.64)   | 468(1.6)    |             |             |
| $\text{Fe}((\text{C}_6\text{F}_5\text{S})_2\text{Gm})_3(\text{BC}_6\text{F}_5)_2$                                   | 257(33)     | 284(12)     |             | 310(7.3)    |             | 408(2.0)    |             | 490(24)     |             |
| $\text{Fe}((\text{CF}_3\text{C}_6\text{F}_4\text{S})_2\text{Gm})_3(\text{BC}_6\text{F}_5)_2$                        | 249(32)     |             | 294(34)     | 310(9.2)    | 356(4.4)    |             | 444(3.3)    | 490(18)     | 506(7.0)    |
| $\text{Fe}((\text{ClC}_6\text{F}_4\text{S})_2\text{Gm})_3(\text{BC}_6\text{F}_5)_2$                                 | 246(43)     | 276(24)     | 287(19)     | 323(9.3)    |             | 392(3.9)    |             | 492(29)     |             |
| $\text{Co}((\text{C}_6\text{F}_5\text{S})_2\text{Gm})_3(\text{BC}_6\text{F}_5)_2$                                   | 252(28)     |             | 273(15)     | 313(11)     | 354(6.9)    | 395(6.8)    | 424(3.4)    |             | 509(7.7)    |
| $\text{Co}((\text{CF}_3\text{C}_6\text{F}_4\text{S})_2\text{Gm})_3(\text{BC}_6\text{F}_5)_2$                        | 258(47)     |             | 288(18)     | 310(12)     | 355(7.2)    | 398(7.3)    | 440(2.6)    |             | 511(7.9)    |
| $\text{Co}((\text{ClC}_6\text{F}_4\text{S})_2\text{Gm})_3(\text{BC}_6\text{F}_5)_2$                                 | 257(34)     |             | 283(18)     | 318(11)     |             | 397(7.6)    | 468(2.0)    |             | 511(7.0)    |
| $\text{Fe}((\text{C}_6\text{F}_5\text{S})_2\text{Gm})_3(\text{Bn}-\text{C}_4\text{H}_9)_2$ <sup>4b</sup>            |             | 273(28)     |             | 303(8.3)    |             | 422(3.1)    | 482(3.5)    | 492(21)     |             |
| $\text{Fe}((\text{ClC}_6\text{F}_4\text{S})_2\text{Gm})_3(\text{Bn}-\text{C}_4\text{H}_9)_2$ <sup>4b</sup>          | 247(33)     | 270(7.7)    | 285(17)     | 310(7.4)    | 343(2.7)    | 398(1.1)    | 485(10.4)   |             | 501(5.2)    |
| $\text{Fe}((\text{CF}_3\text{C}_6\text{F}_4\text{S})_2\text{Gm})_3(\text{Bn}-\text{C}_4\text{H}_9)_2$ <sup>4b</sup> | 246(52)     | 262(12)     | 289(40)     | 316(14)     | 353(4.0)    | 389(2.0)    | 477(11)     | 496(19)     |             |
| $\text{Co}((\text{C}_6\text{F}_5\text{S})_2\text{Gm})_3(\text{Bn}-\text{C}_4\text{H}_9)_2$ <sup>4b</sup>            | 238(23)     | 274(11)     | 305(6.0)    | 333(3.8)    | 373(3.3)    | 399(2.9)    | 462(1.3)    |             | 511(4.2)    |
| $\text{Co}((\text{ClC}_6\text{F}_4\text{S})_2\text{Gm})_3(\text{Bn}-\text{C}_4\text{H}_9)_2$ <sup>4b</sup>          | 242(22)     | 269(7.8)    | 285(6.2)    | 302(7.0)    | 345(2.9)    | 382(1.2)    | 401(2.4)    | 448(1.9)    | 512(2.7)    |
| $\text{Co}((\text{CF}_3\text{C}_6\text{F}_4\text{S})_2\text{Gm})_3(\text{Bn}-\text{C}_4\text{H}_9)_2$ <sup>4b</sup> | 258(22)     | 288(15)     | 317(7.0)    | 352(3.8)    | 395(4.1)    | 429(1.3)    |             | 502(1.7)    | 510(3.0)    |

## ESI references

S1. G.Ponzio, F.Baldrocco, *Gazz. Chim.Ital.*, 1930, **60**, 415–420

S2. Y.Z. Voloshin, O.A. Varzatskii, A.V. Palchik, A.I. Stash and V.K. Belsky, *New J. Chem.*, 1999, **23**, 355–358

S3. Y.Z. Voloshin, O.A. Varzatskii, T.E. Kron, V.K. Belsky, V.E. Zavodnik, A.V. Palchik, *Inorg. Chem.*, 2000, **39**, 1907–1918
